# Supplementary material for: A quantitative, multi-national and multi-stakeholder assessment of barriers to the adoption of cell therapies
Source: PubMed Central journal article supplement (PMC5557158; doi:10.1177/2041731417724413), 2017-08-11

**Supplementary Material S2 – Breakdown of results by each type of response to questions on barriers to cellular therapies**

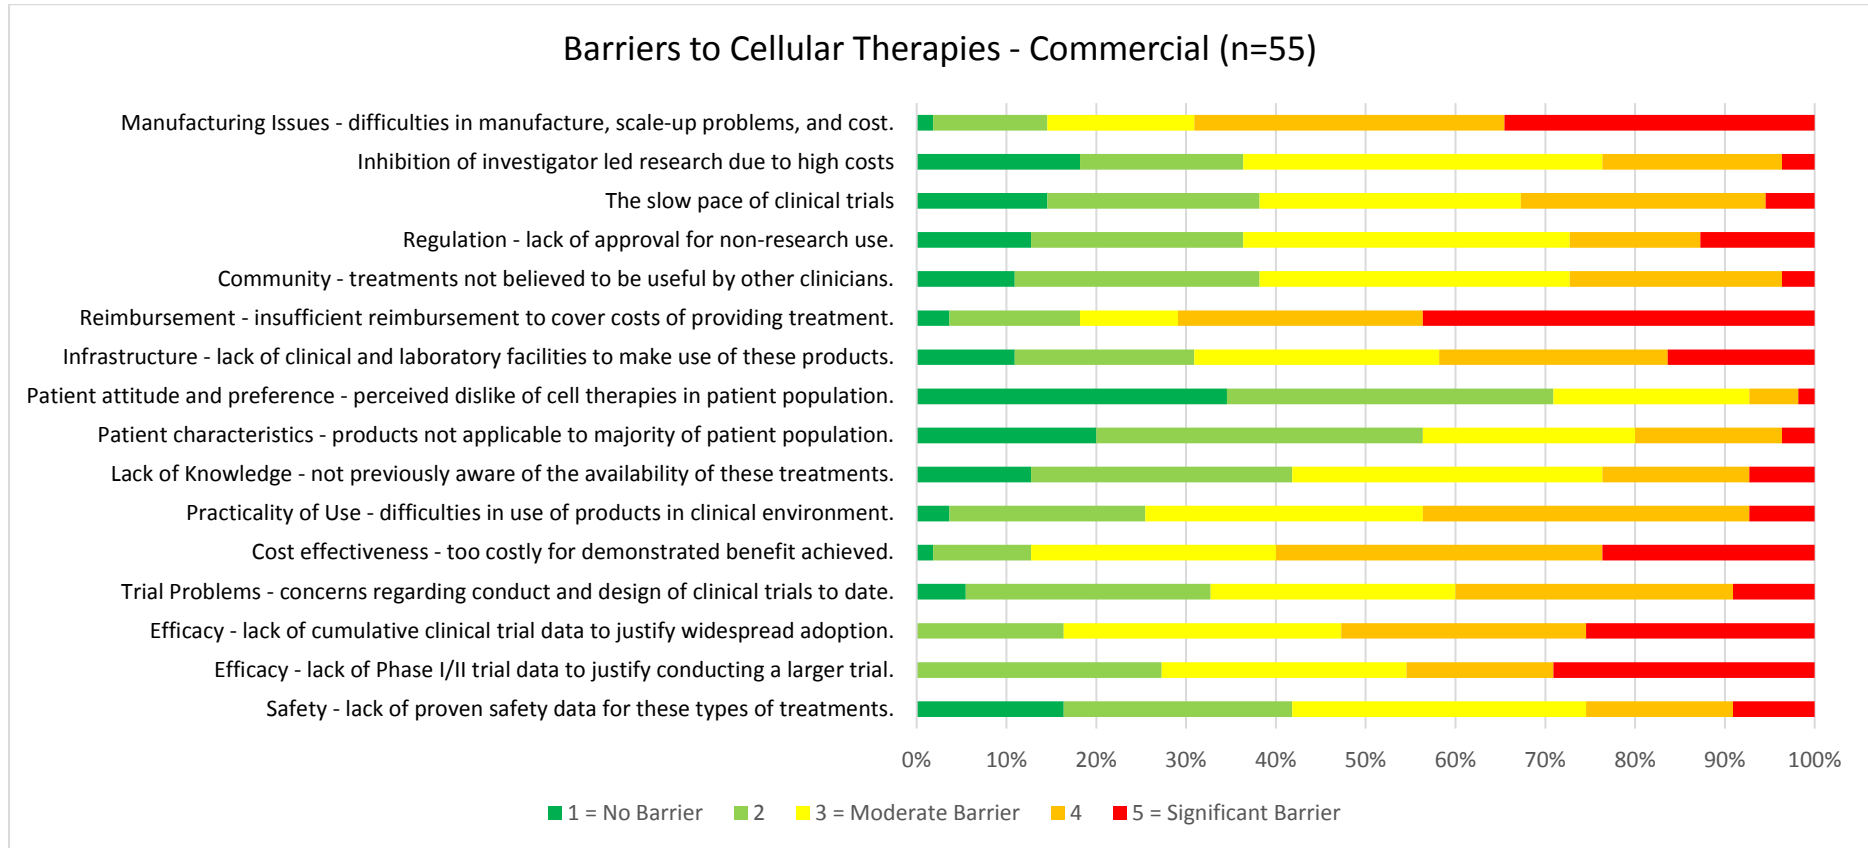

## Barriers to Cellular Therapies - Researchers (n=36)

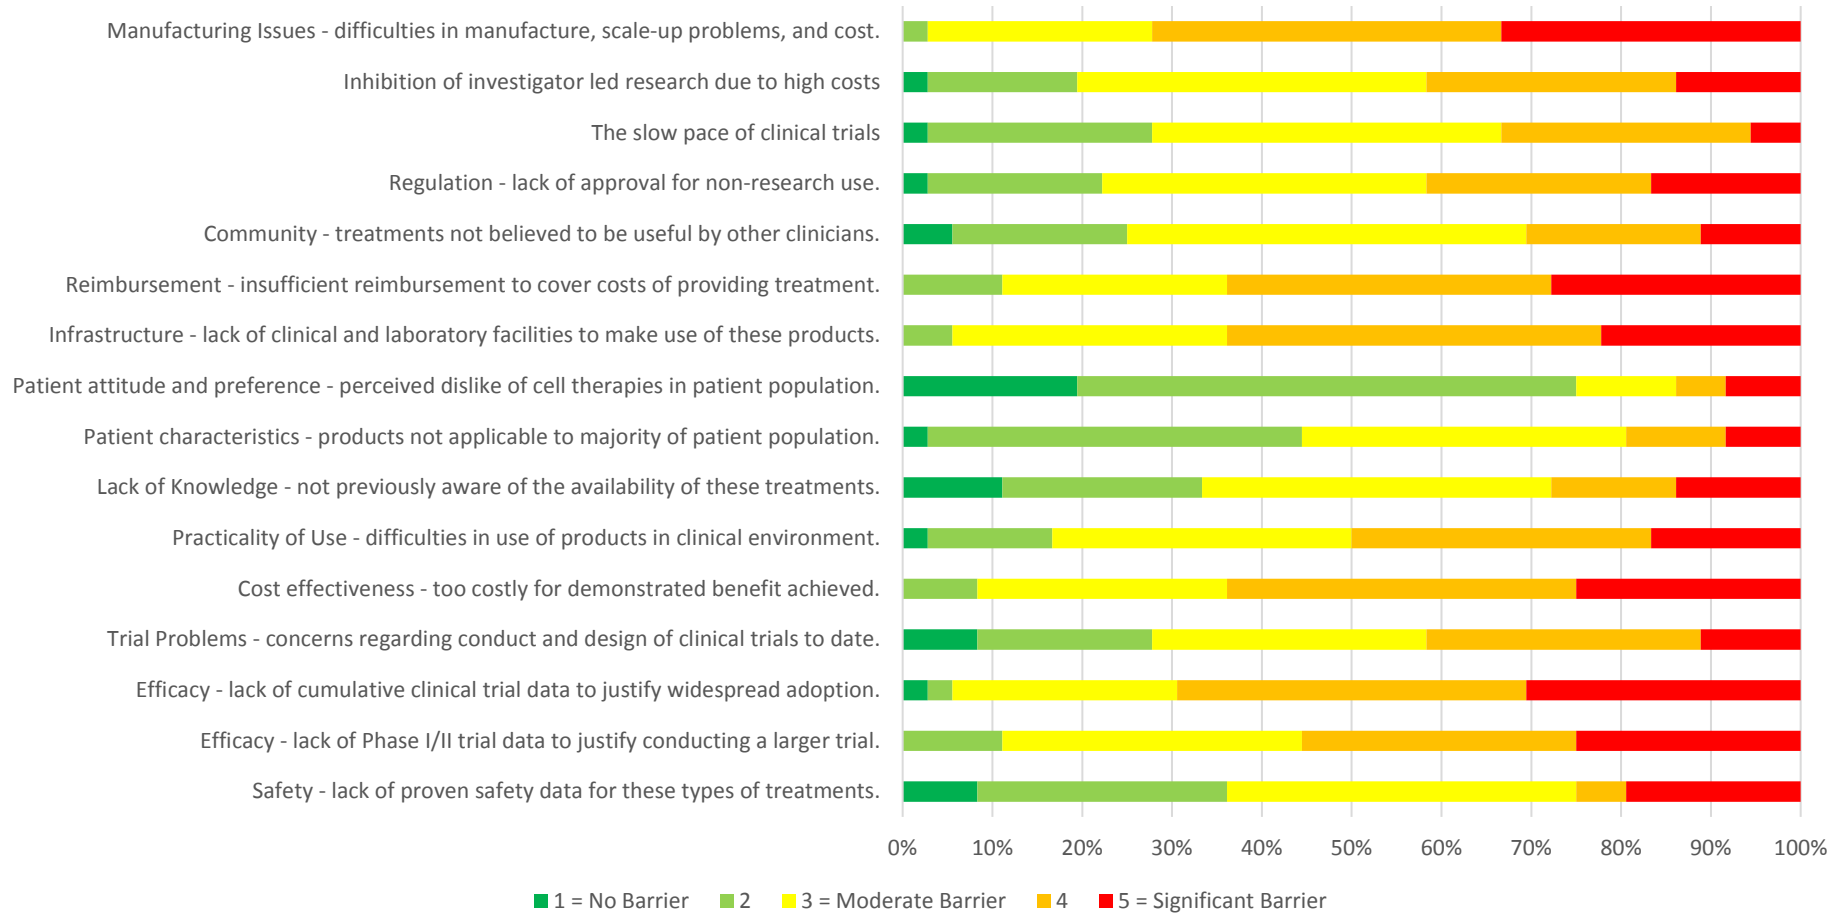

## Barriers to Cellular Therapies - Clinical (n=8)

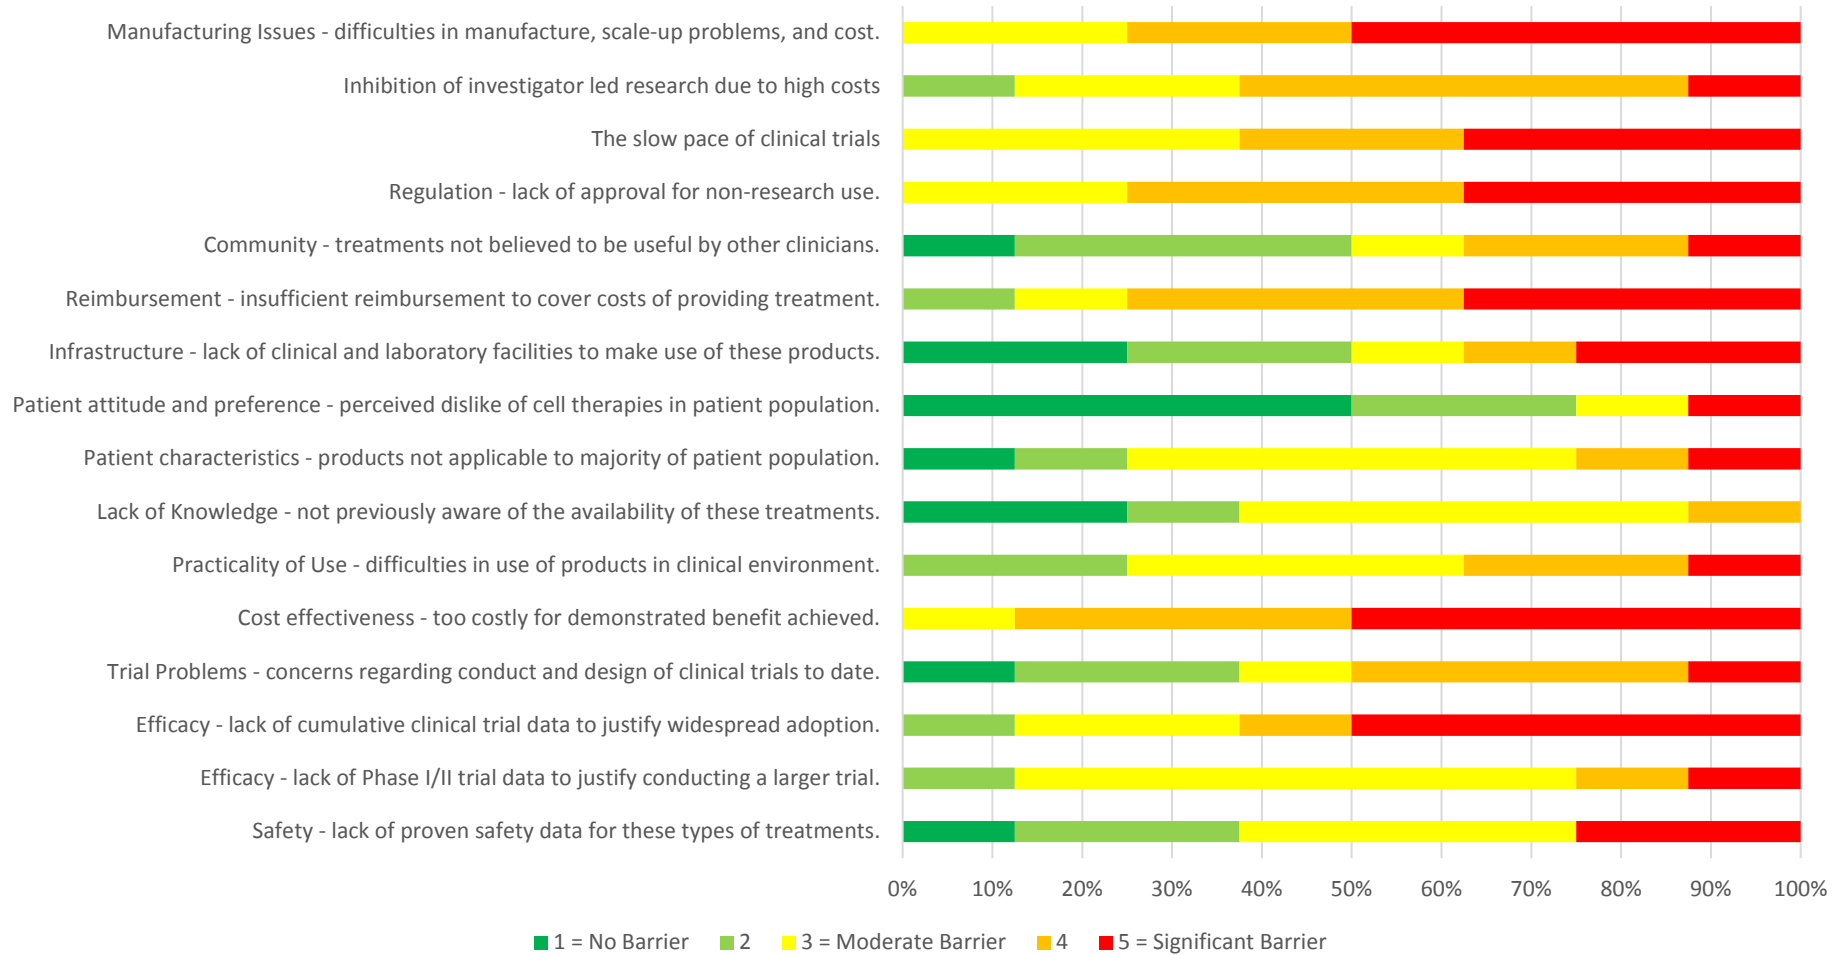

Supplement: Supplimentary_Material_S2.pdf [file Supplimentary_Material_S2.pdf]
